# Supplementary material
Source: MDPI journal article supplement (https://www.mdpi.com/1424-8247/14/5/405)
Supplement: s1 [file s1]

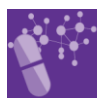

# Bare iron oxide nanoparticles as drug delivery carrier for the short cationic peptide lasioglossin

Chiara Turrina <sup>1</sup>, Sonja Berensmeier <sup>1</sup> and Sebastian P. Schwaminger <sup>1,\*</sup>

<sup>1</sup> Bioseparation Engineering Group, Department of Mechanical Engineering, Technical University of Munich

\* Correspondence: s.schwaminger@tum.de

## Particle characterization

**Table S1:** BION Size calculation with the Scherrer equation from XRD data, measured with Mo K $\alpha$ . The lattice constant is calculated from the Bragg equation.

|           |         |         |         |         |
|-----------|---------|---------|---------|---------|
| $2\theta$ | 16.01   | 13.72   | 19.40   | Average |
| Size      | 9.07 nm | 8.71 nm | 9.74 nm | 9.17 nm |

Scherrer equation:

$$L = \frac{0.89-0.07093 \text{ nm}}{\Delta 2\theta \cdot \cos(\theta)} \quad (\text{S2})$$

**Table S2:** Modified Langevin fit for SQUID Analysis

|               | y0              | xc               | C                | s                  |
|---------------|-----------------|------------------|------------------|--------------------|
| Magnetization | 0.13902±0.66446 | 2.96189±25.77472 | 58.02718±0.79117 | 352.84062±22.54824 |

Boltzmann fit for Zeta Potential Analysis:

$$y = -39.61 + (15.46 - (-39.61)) / (1 + (e^{x-8.21})^{0.25}) \quad (\text{S1})$$

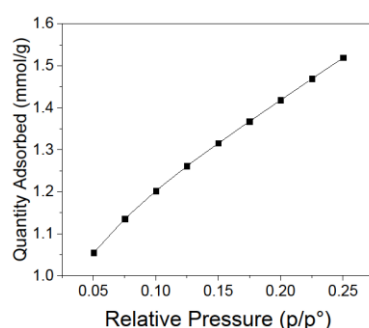

**Figure S1:** BET measurement: Adsorbed nitrogen to relative pressure.

## Drug loading

$$\text{Drug loading} = \frac{m(\text{drug})}{m(\text{drug}) + m(\text{nanocarrier})} \quad (\text{S3})$$

**Figure S2:** Exemplary calibration curves for the photometric measurements for the adsorption and release experiments.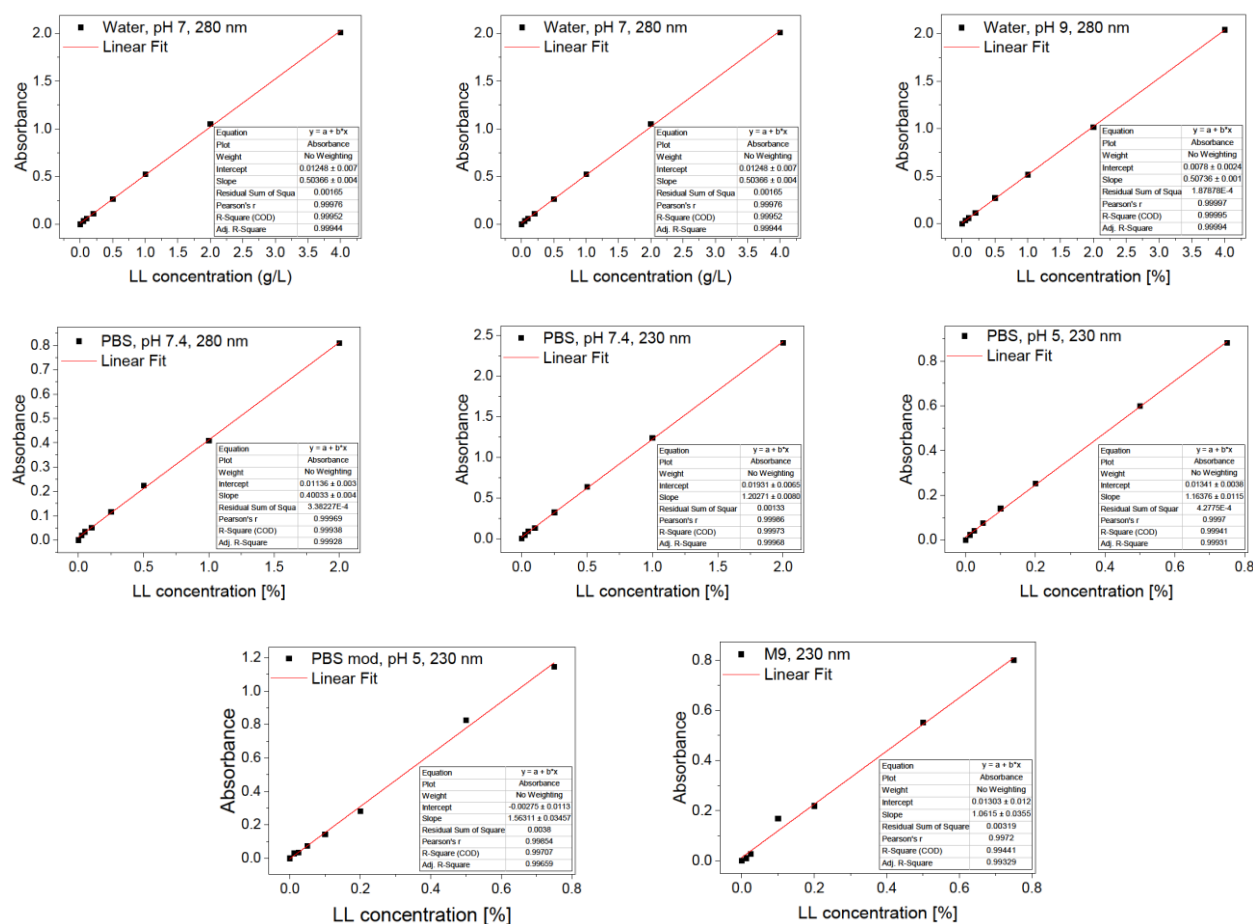

A new calibration curve was generated for each measurement, so these curves are exemplary for all the used conditions.

**Table S3:** Data of Adsorption and release experiments.

| LL Conc. | Adsorption: Water, pH 7, 280 nm |         |         | Washing 1: Water, pH 7, 280 nm |         |         | Adsorption: Water, pH 9, 280 nm |         |         | Washing 1: Water, pH 9, 280 nm |         |         |
|----------|---------------------------------|---------|---------|--------------------------------|---------|---------|---------------------------------|---------|---------|--------------------------------|---------|---------|
|          | Absorbance                      |         |         | Absorbance                     |         |         | Absorbance                      |         |         | Absorbance                     |         |         |
| [g/L]    | Value 1                         | Value 2 | Value 3 | Value 1                        | Value 2 | Value 3 | Value 1                         | Value 2 | Value 3 | Value 1                        | Value 2 | Value 3 |
| 0        | 0.0727                          | 0.059   | 0.0773  | 0.0414                         | 0.0427  | 0.0414  | 0.0409                          | 0.0432  | 0.0414  | 0.0403                         | 0.0401  | 0.0403  |
| 0.025    | 0.0558                          | 0.0972  | 0.127   | 0.0422                         | 0.0426  | 0.0815  | 0.0656                          | 0.0756  | 0.0555  | 0.0938                         | 0.0767  | 0.0593  |
| 0.05     | 0.0839                          | 0.0622  | 0.0822  | 0.0532                         | 0.045   | 0.0452  | 0.0816                          | 0.0698  | 0.0819  | 0.052                          | 0.056   | 0.0496  |
| 0.1      | 0.107                           | 0.103   | 0.162   | 0.0429                         | 0.0478  | 0.0465  | 0.062                           | 0.073   | 0.101   | 0.0441                         | 0.046   | 0.0558  |
| 0.25     | 0.163                           | 0.155   | 0.156   | 0.0496                         | 0.0499  | 0.0455  | 0.113                           | 0.0975  | 0.114   | 0.0423                         | 0.0422  | 0.0465  |
| 0.5      | 0.262                           | 0.274   | 0.237   | 0.0478                         | 0.0496  | 0.0497  | 0.223                           | 0.224   | 0.235   | 0.0501                         | 0.0565  | 0.071   |
| 1        | 0.505                           | 0.459   | 0.487   | 0.0648                         | 0.0574  | 0.0739  | 0.452                           | 0.444   | 0.427   | 0.0842                         | 0.0744  | 0.0845  |
| 2        | 1                               | 1.01    | 1.01    | 0.124                          | 0.0969  | 0.11    | 0.834                           | 0.892   | 0.93    | 0.127                          | 0.136   | 0.15    |

| LL<br>Conc. | Adsorption: PBS, pH 7.4,<br>280 nm |         |         | Washing 1: PBS, pH 7.4,<br>280 nm |         |         | Adsorption: PBS, pH 7.4,<br>230 nm |         |         | Washing 1: PBS, pH 7.4,<br>230 nm |         |         |
|-------------|------------------------------------|---------|---------|-----------------------------------|---------|---------|------------------------------------|---------|---------|-----------------------------------|---------|---------|
|             | Absorbance                         |         |         | Absorbance                        |         |         | Absorbance                         |         |         | Absorbance                        |         |         |
| [g/L]       | Value 1                            | Value 2 | Value 3 | Value 1                           | Value 2 | Value 3 | Value 1                            | Value 2 | Value 3 | Value 1                           | Value 2 | Value 3 |
| 0           | 0.0446                             | 0.0429  | 0.0439  | 0.0456                            | 0.0456  | 0.0455  | 0.082                              | 0.0794  | 0.0803  | 0.0809                            | 0.0809  | 0.0814  |
| 2           | 0.581                              | 0.683   | 0.648   | 0.141                             | 0.161   | 0.171   | 1.74                               | 2.01    | 1.93    | 0.349                             | 0.387   | 0.418   |
| 1           | 0.261                              | 0.241   | 0.25    | 0.123                             | 0.126   | 0.136   | 0.688                              | 0.637   | 0.641   | 0.293                             | 0.297   | 0.305   |
| 0.5         | 0.121                              | 0.113   | 0.12    | 0.097                             | 0.0943  | 0.105   | 0.274                              | 0.263   | 0.214   | 0.209                             | 0.194   | 0.199   |
| 0.25        | 0.0794                             | 0.0849  | 0.0989  | 0.0833                            | 0.12    | 0.0863  | 0.148                              | 0.17    | 0.216   | 0.147                             | 0.194   | 0.159   |
| 0.1         | 0.0642                             | 0.0873  | 0.0895  | 0.0781                            | 0.0855  | 0.0968  | 0.118                              | 0.148   | 0.15    | 0.131                             | 0.139   | 0.152   |
| 0.05        | 0.0693                             | 0.0628  | 0.0921  | 0.0643                            | 0.073   | 0.0915  | 0.119                              | 0.114   | 0.148   | 0.114                             | 0.122   | 0.144   |
| 0.025       | 0.0571                             | 0.0532  | 0.0593  | 0.054                             | 0.0601  | 0.0786  | 0.102                              | 0.0958  | 0.104   | 0.0942                            | 0.0992  | 0.125   |

| Elution       | LL Start<br>Concentration | Absorbance: 1 h |         |         | Absorbance: 17 h |         |         | Absorbance: 27 h |         |         |
|---------------|---------------------------|-----------------|---------|---------|------------------|---------|---------|------------------|---------|---------|
|               | [g/L]                     | Value 1         | Value 2 | Value 3 | Value 1          | Value 2 | Value 3 | Value 1          | Value 2 | Value 3 |
| 230 nm        |                           |                 |         |         |                  |         |         |                  |         |         |
| PBS, pH 5, 25 | 1                         | 0.18            | 0.159   | 0.164   |                  |         |         |                  |         |         |
| °C            | 0                         | 0.0801          | 0.0807  | 0.08    |                  |         |         |                  |         |         |
| PBS, pH 5, 40 | 1                         | 0.167           | 0.159   | 0.168   | 0.171            | 0.164   | 0.181   | 0.189            | 0.177   | 0.196   |
| °C            | 0                         | 0.085           | 0.0859  | 0.0853  | 0.0842           | 0.0842  | 0.0844  | 0.0861           | 0.086   | 0.0861  |
| PBS, pH 5, 60 | 1                         | 0.33            | 0.268   | 0.205   |                  |         |         |                  |         |         |
| °C            | 0                         | 0.088           | 0.0879  | 0.0888  |                  |         |         |                  |         |         |
| PBS mod, pH   | 1                         | 0.23            | 0.221   | 0.234   |                  |         |         |                  |         |         |
| 5, 25 °C      | 0                         | 0.088           | 0.0889  | 0.0905  |                  |         |         |                  |         |         |
| PBS mod, pH   | 1                         | 0.24            | 0.245   | 0.22    |                  |         |         |                  |         |         |
| 5, 60 °C      | 0                         | 0.0905          | 0.0909  | 0.0907  |                  |         |         |                  |         |         |
| M9, 37 °C     | 1                         | 0.2             | 0.199   | 0.199   | 0.219            | 0.214   | 0.207   | 0.236            | 0.232   | 0.218   |
|               | 0                         | 0.185           | 0.189   | 0.182   | 0.201            | 0.215   | 0.218   | 0.211            | 0.211   | 0.212   |

| Elution kinetic | LL Start Concentration |       |       |        |        |        |         |         |
|-----------------|------------------------|-------|-------|--------|--------|--------|---------|---------|
| 230 nm          | [g/L]                  | 1 min | 5 min | 15 min | 30 min | 60 min | 180 min | 810 min |
|                 | 1                      | 0.23  | 0.226 | 0.227  | 0.233  | 0.225  | 0.232   | 0.264   |
| PBS, pH 5, 25   | 1                      | 0.24  | 0.247 | 0.221  | 0.228  | 0.226  | 0.238   | 0.343   |
| °C              | 1                      | 0.234 | 0.234 | 0.229  | 0.262  | 0.227  | 0.222   | 0.26    |
|                 | 0                      | 0.113 | 0.112 | 0.102  | 0.106  | 0.102  | 0.103   | 0.107   |

| Adsorption kinetic | LL Starting Concentration |        |        |        |        |        |         |          |
|--------------------|---------------------------|--------|--------|--------|--------|--------|---------|----------|
|                    | [g/L]                     | 1 min  | 6 min  | 16 min | 31 min | 61 min | 181 min | 1441 min |
| 230 nm             | 1                         | 0.316  | 0.287  | 0.259  | 0.287  | 0.27   | 0.275   | 0.263    |
| PBS, pH 5, 25 °C   | 1                         | 0.324  | 0.267  | 0.229  | 0.26   | 0.276  | 0.278   | 0.278    |
|                    | 1                         | 0.321  | 0.277  | 0.244  | 0.275  | 0.272  | 0.277   | 0.271    |
|                    | 0                         | 0.0453 | 0.0461 | 0.0453 |        |        |         |          |

For the calculation of all experiments the blank is subtracted from the adsorption or desorption data.

**Table S4:** Influence of Washing on the peptide loading in PBS buffer.

| Starting peptide concentration [g/L] | Equilibrium peptide concentration [g/L] | Loading Adsorption [g/g] | Loading Washing 1 [g/g] | Loss 1 [%] | Loading Washing 2 [g/g] | Loss 2 [%] | Loading Washing 3 [g/g] | Loss 3 [%] |
|--------------------------------------|-----------------------------------------|--------------------------|-------------------------|------------|-------------------------|------------|-------------------------|------------|
| 2.00                                 | 1.45                                    | 0.55                     | 0.29                    | 46.1       | 0.24                    | 17.7       | 0.20                    | 15.5       |
| 1.00                                 | 0.49                                    | 0.51                     | 0.33                    | 34.8       | 0.27                    | 20.2       | 0.21                    | 22.2       |
| 0.50                                 | 0.17                                    | 0.34                     | 0.24                    | 30.4       | 0.15                    | 37.7       | 0.06                    | 58.4       |

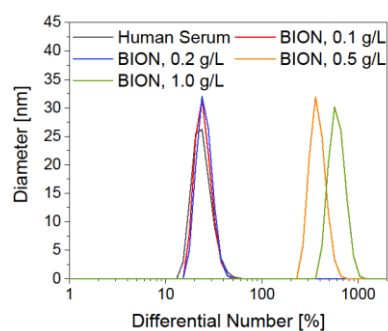

**Figure S3:** Agglomeration behavior of BIONs in Human Serum depending on the concentration.

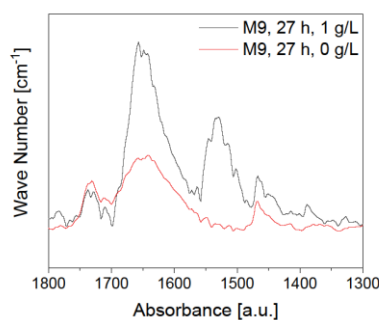

**Figure S4:** IR spectra of BION@LL and only BIONs after 27 h desorption in M9 medium.

### Growth studies

**Table S5:** Components of M9 Medium for 1 L (867 ml sterile water).

| Solution                       | Composition                            | Amount of substances | Volume     |
|--------------------------------|----------------------------------------|----------------------|------------|
| M9 salt solution (10x)         | Na <sub>2</sub> HPO <sub>4</sub>       | 33.7 mM              | 100 mL     |
|                                | KH <sub>2</sub> PO <sub>4</sub>        | 22.0 mM              |            |
|                                | NaCl                                   | 8.55 mM              |            |
|                                | NH <sub>4</sub> Cl                     | 9.35 mM              |            |
| 20% glucose solution           | Glucose monohydrate                    | 0.40%                | 20 mL      |
| 1 M MgSO <sub>4</sub> solution | MgSO <sub>4</sub> ·7 H <sub>2</sub> O  | 1.00 mM              | 1 mL       |
| 1 M CaCl <sub>2</sub> solution | CaCl <sub>2</sub> ·2 H <sub>2</sub> O  | 0.30 mM              | 0.3 mL     |
| 1 M mg/mL biotin solution      | Biotin                                 | 1.00 µg              | 1 mL       |
| 1 M mg/mL thiamin solution     | Thiamin                                | 1.00 µg              | 1 mL       |
| Trace elements solution (100x) | EDTA                                   | 13.4 mM              | 10 mL (1x) |
|                                | FeCl <sub>3</sub> ·6 H <sub>2</sub> O  | 3.10 mM              |            |
|                                | ZnCl <sub>2</sub>                      | 0.62 mM              |            |
|                                | CuCl <sub>2</sub> ·2 H <sub>2</sub> O  | 76.0 µM              |            |
|                                | CoCl <sub>2</sub> ·2 H <sub>2</sub> O  | 42.0 µM              |            |
|                                | H <sub>3</sub> BO <sub>3</sub>         | 162 µM               |            |
|                                | MNCl <sub>2</sub> · 4 H <sub>2</sub> O | 8.10 µM              |            |

### Microscopy

For each measurement, five group squares of biological triplicates are counted.

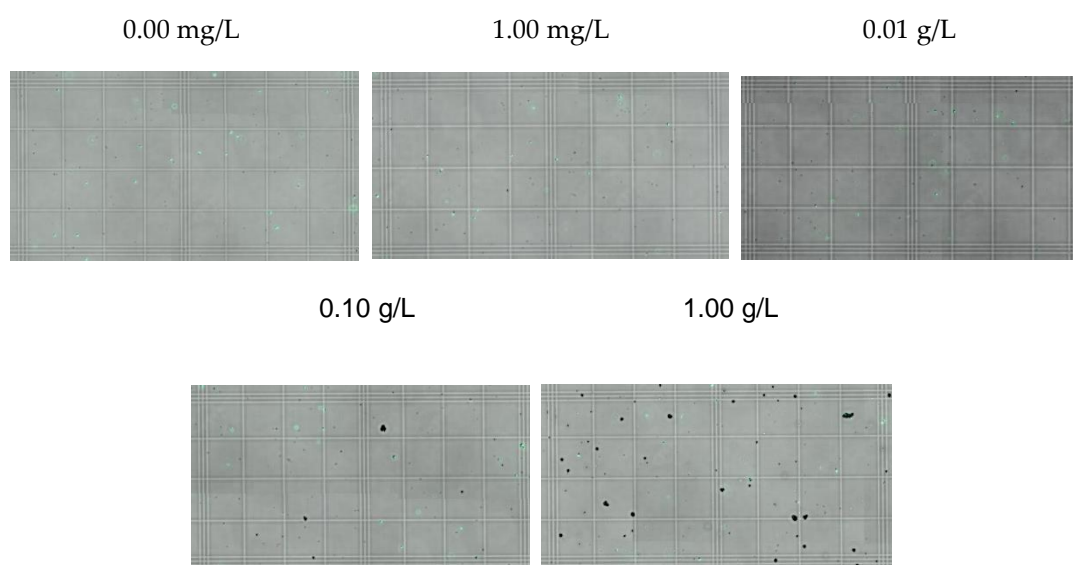

**Figure S5:** *E. coli* colony grown in M9 media with ampicillin, incubated with different concentrations of BIONs (37 °C, addition of IPTG after 5 h).

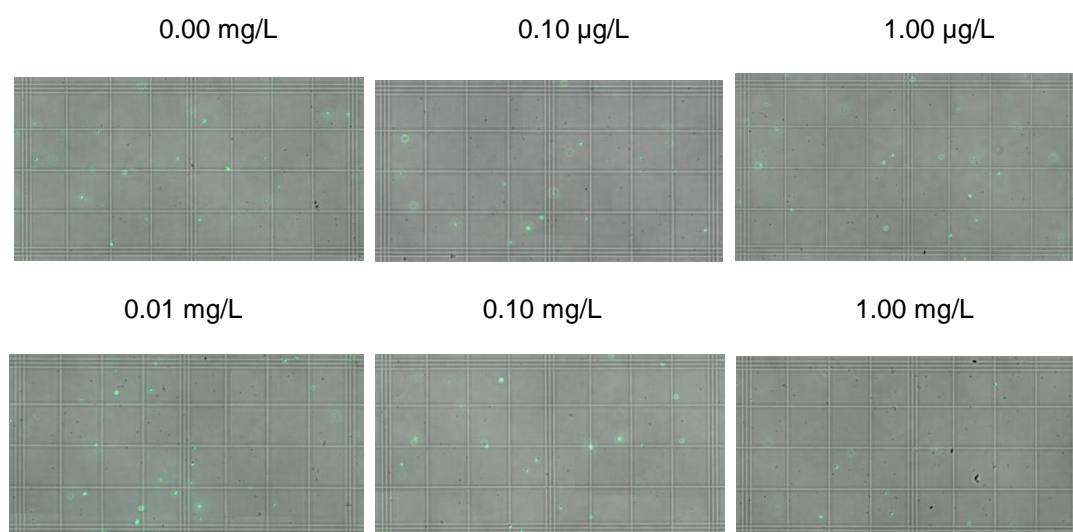

**Figure S6:** *E. coli* colony grown in M9 media with ampicillin, incubated with different concentrations of LL (37 °C, addition of IPTG after 5 h).

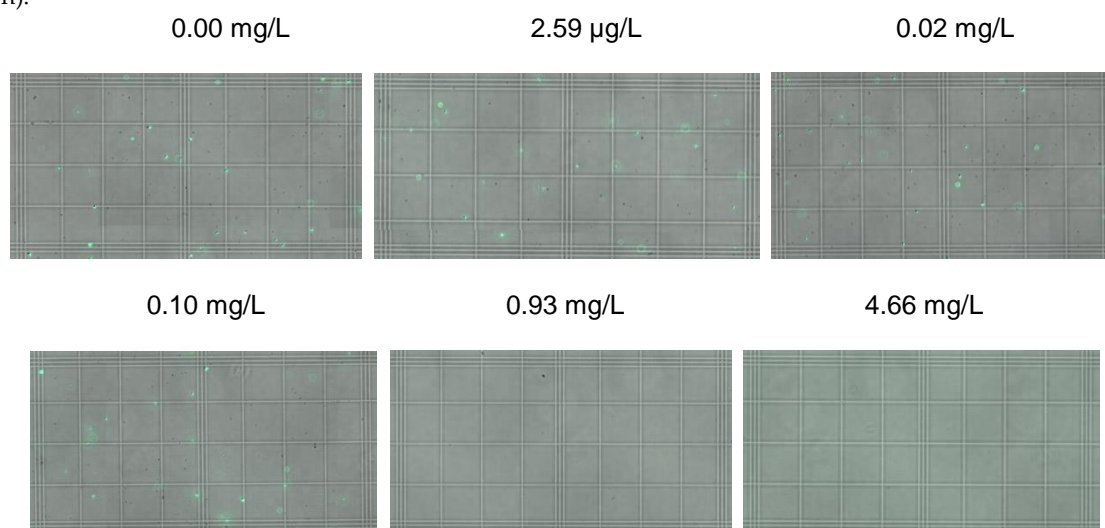

OD<sub>600</sub>

**Figure S7:** *E. coli* colony grown in M9 media with ampicillin, incubated with different concentrations of BION@LL (37 °C, addition of IPTG after 5 h).

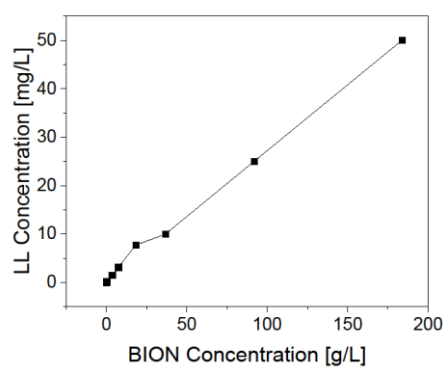

**Figure S8:** Amount of LL loaded on BIONs.
